# Supplementary material
Source: publisher site journal article supplement (https://www.dovepress.com/article/343902)
Supplement: Supplementary file 1 [file get_supplementary_file.php]

**Supplementary Material for**

**iRGD tumor-penetrating peptide-modified** **nano-delivery system based on a marine sulfated polysaccharide** **for** **enhanced anti-tumor efficiency against breast cancer**

Bowei Chena,1, Xiaohong Liua,1, Yunan Lia, Tianhe Shana, Liya Baia, Chunyu Lib,*, Yinsong Wanga,*

a *School of Pharmacy, Tianjin Key Laboratory on Technologies Enabling Development of Clinical Therapeutics and Diagnostics (Theranostics), Tianjin Medical University, Tianjin 300070, China*

b *Department of Integrated Traditional Chinese and Western Medicine, International Medical School, Tianjin Medical University, Tianjin 300070, China*

Corresponding Authors

*E-mail: wangyinsong@tmu.edu.cn (Yinsong Wang)

*E-mail: lichunyu@tmu.edu.cn (Chunyu Li)

ORCID

Yinsong Wang: 0000-0002-1403-2113

Chunyu Li: 0000-0001-8266-588X

1 B. Chen and X. Liu contributed equally to this work.


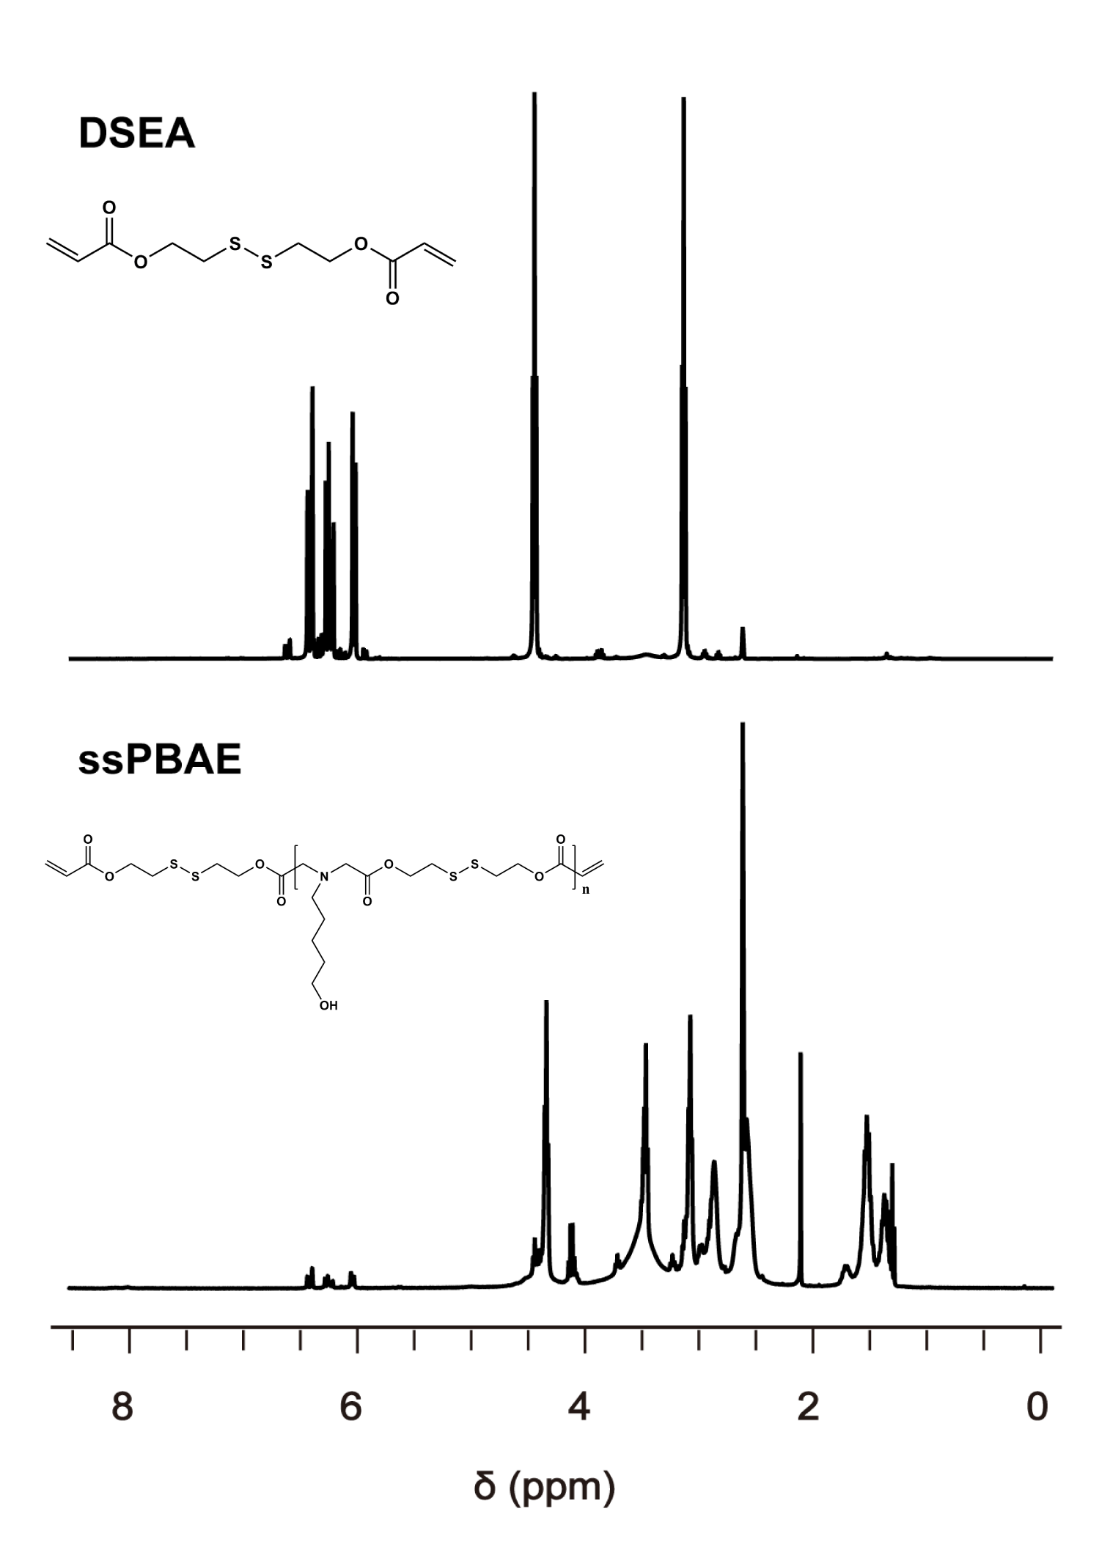


Fig. S1. The 1H-NMR spectra of ssPBAE.


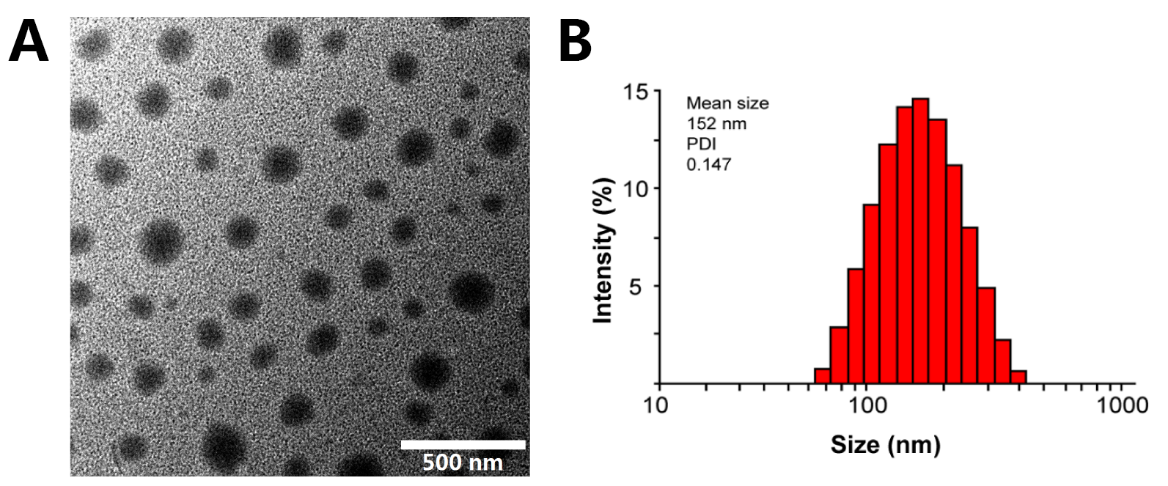


Fig. S2. (a) The morphology of PSS@PBAE@JQ1/ORI nanoparticles observed by the TEM. (b) The size distribution of PSS@PBAE@JQ1/ORI nanoparticles detected by the dynamic laser scattering method.


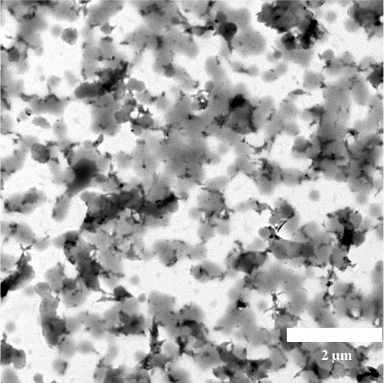


Fig. S3. The morphology of iRGD-PSS@PBAE@JQ1/ORI nanoparticles after 24 h incubation in DTT (10 mM) solution observed by the TEM.


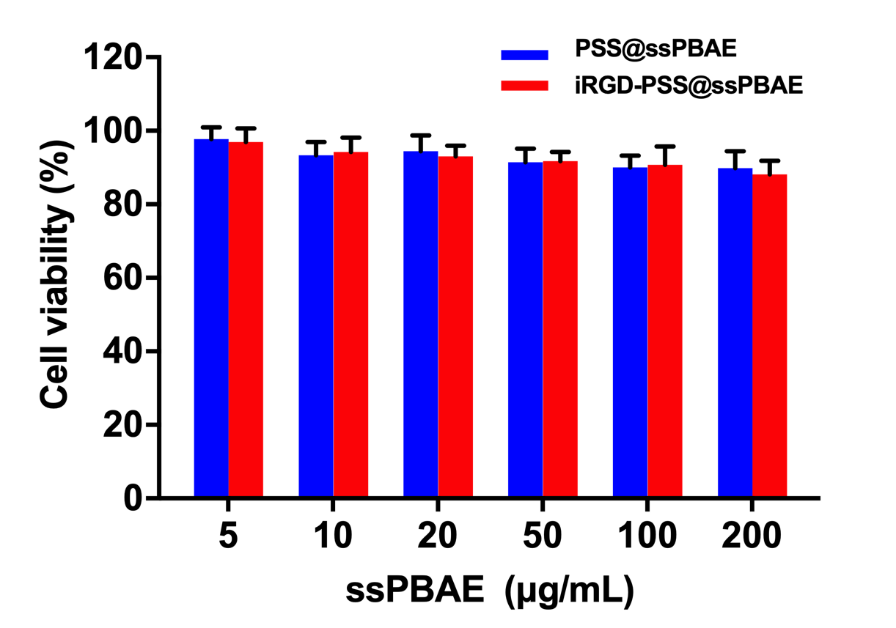


Fig. S4. The cytotoxicities of PSS@ssPBAE and iRGD-PSS@ssPBAE in 4T1 cells after 48-hour treatments at different ssPBAE concentrations.
